# Supplementary material for: IFNAR signaling of neuroectodermal cells is essential for the survival of C57BL/6 mice infected with Theiler’s murine encephalomyelitis virus
Source: Springer Nature journal article supplement (doi:10.1186/s12974-023-02737-6), 2023-03-05

## **Additional Information**

**IFNAR signaling of neuroectodermal cells is essential for the survival of C57BL/6 mice infected with Theiler's murine encephalomyelitis virus**

Melanie Bühler, Dandan Li, Lin Li, Sandra Runft, Inken Walzl, Andreas Pavlou, Ulrich Kalinke, Malgorzata Ciurkiewicz, Jochen Huehn, Stefan Floess, Andreas Beineke, Wolfgang Baumgärtner, Ingo Gerhauser

**Table S1:** Summary of primer pairs used for reverse transcriptase polymerase chain reaction.

| Gene                 | Acc. no.       | Primer direction | Primer position in mRNA | Sequence of primer from 5'→3'      | Amplicon length |
|----------------------|----------------|------------------|-------------------------|------------------------------------|-----------------|
| <b>Actb</b>          | NM_007393.5    | forward          | 698-717                 | GGC TAC AGC TTC ACC ACC AC         | 233 bp          |
|                      |                | reverse          | 911-930                 | ATG CCA CAG GAT TCC ATA CC         |                 |
| <b>Eif2ak1 (PKR)</b> | NM_011163.4    | forward          | 1039-1062               | GTA CAA GCG CTG GCA GAA CTC AAT    | 125 bp          |
|                      |                | reverse          | 1143-1163               | AAG AGG CAC CGG GTT TTG TAT        |                 |
| <b>Gapdh</b>         | NM_001289726.2 | forward          | 371-390                 | GAG GCC GGT GCT GAG TAT GT         | 288 bp          |
|                      |                | reverse          | 639-658                 | GGT GGC AGT GAT GGC ATG GA         |                 |
| <b>Hprt</b>          | NM_013556.2    | forward          | 646-665                 | GGA CCT CTC GAA GTG TTG GA         | 169 bp          |
|                      |                | reverse          | 795-814                 | TTG CGC TCA TCT TAG GCT TT         |                 |
| <b>Ifna</b>          | various*       | forward          | various*                | ATG GCT AGR CTC TGT GCT TTC CT     | 512-524 bp*     |
|                      |                | reverse          |                         | AGG GCT CTC CAG AYT TCT GCT CTG    |                 |
| <b>Ifnb1</b>         | NM_010510.2    | forward          | 206-230                 | TGA ATG GAA AGA TCA ACC TCA CCT A  | 76 bp           |
|                      |                | reverse          | 260-281                 | CTC TTC TGC ATC TTC TCC GTC A      |                 |
| <b>Ifng</b>          | NM_008337.2    | forward          | 175-194                 | CAC GGC ACA GTC ATT GAA AG         | 144 bp          |
|                      |                | reverse          | 299-318                 | AAT CTG GCT CTG CAG GAT TT         |                 |
| <b>Il1b</b>          | NM_008361.4    | forward          | 311-330                 | AGC TAC CTG TGT CTT TCC CG         | 150 bp          |
|                      |                | reverse          | 439-460                 | AGT GCA GTT GTC TAA TGG GAA C      |                 |
| <b>Il4</b>           | NM_021283.2    | forward          | 224-245                 | CCT CAC AGC AAC GAA GAA CAC C      | 156 bp          |
|                      |                | reverse          | 358-379                 | CAT CGA AAA GCC CGA AAG AGT C      |                 |
| <b>Il6</b>           | NM_031168.2    | forward          | 250-269                 | GTT CTC TGG GAA ATC GTG GA         | 176 bp          |
|                      |                | reverse          | 404-425                 | CCA GAG GAA ATT TTC AAT AGG C      |                 |
| <b>Il10</b>          | NM_010548.2    | forward          | 307-326                 | CCA AGC CTT ATC GGA AAT GA         | 162 bp          |
|                      |                | reverse          | 449-468                 | TTT TCA CAG GGG AGA AAT CG         |                 |
| <b>Il12b</b>         | NM_001303244.1 | forward          | 929-948                 | AGG TGC GTT CCT CGT AGA GA         | 241 bp          |
|                      |                | reverse          | 1150-1169               | AAA GCC AAC CAA GCA GAA GA         |                 |
| <b>Irf7</b>          | NM_016850.3    | forward          | 468-487                 | CGA GTG CTG TTT GGA GAC TG         | 156 bp          |
|                      |                | reverse          | 604-623                 | GGC CTT GAA GAT CTG TGC AT         |                 |
| <b>Isg15</b>         | NM_015783.3    | forward          | 333-351                 | AAC TGC AGC GAG CCT CTG A          | 105 bp          |
|                      |                | reverse          | 412-437                 | CAC CTT CTT CTT AAG CGT GTC TAC AG |                 |
| <b>Tgfb1</b>         | NM_011577.1    | forward          | 1719-1738               | TTG CTT CAG CTC CAC AGA GA         | 183 bp          |
|                      |                | reverse          | 1882-1901               | TGG TTG TAG AGG GCA AGG AC         |                 |
| <b>TMEV</b>          | M16020.1       | forward          | 193-214                 | GAC TAA TCA GAG GAA CGT CAG C      | 130 bp          |
|                      |                | reverse          | 303-322                 | GTG AAG AGC GGC AAG TGA GA         |                 |
| <b>Tnfa</b>          | NM_013693.2    | forward          | 257-276                 | GCC TCT TCT CAT TCC TGC TT         | 203 bp          |
|                      |                | reverse          | 440-459                 | CAC TTG GTG GTT TGC TAC GA         |                 |

\* **Ifna1:** NM\_010502.2; **Ifna2:** NM\_010503.2; **Ifna4:** NM\_010504.2; **Ifna5:** NM\_010505.2; **Ifna6:** NM\_206871.1; **Ifna7:** NM\_008334.3; **Ifna9:** NM\_010507.1; **Ifna11:** NM\_008333.2; **Ifna12:** NM\_177361.2; **Ifna13:** NM\_177347.2; **Ifna14:** NM\_206975.1; **Ifna15:** NM\_206870.1; **Ifna16:** NM\_206867.1

**Table S2:** Transcriptional changes in the cerebrum of TMEV- and mock-infected SJL and C57BL/6 mice (fold changes).

| Gene Symbol                          | Gene Title                                                | Strain     | 4 dpi | 7 dpi        | 14 dpi |
|--------------------------------------|-----------------------------------------------------------|------------|-------|--------------|--------|
| <b>Pattern Recognition Receptors</b> |                                                           |            |       |              |        |
| <b>Ddx58</b><br>(RIG-I)              | DEAD (Asp-Glu-Ala-Asp) box polypeptide 58                 | <b>SJL</b> | 5.29  | 9.22         | 1.90   |
|                                      |                                                           | <b>B6</b>  | 6.92  | 7.00         | 1.87   |
| <b>Eif2ak2</b><br>(PKR)              | Eukaryotic translation initiation factor 2-alpha kinase 4 | <b>SJL</b> | 6.18  | <b>11.35</b> | 2.21   |
|                                      |                                                           | <b>B6</b>  | 6.36  | 7.99         | 1.96   |
| <b>Ifih1</b><br>(MDA5)               | Interferon induced with helicase C domain 1               | <b>SJL</b> | 4.28  | 9.25         | 1.94   |
|                                      |                                                           | <b>B6</b>  | 5.67  | 6.64         | 1.80   |
| <b>Tlr1</b>                          | Toll-like receptor 1                                      | <b>SJL</b> | 2.12  | 2.65         | 1.95   |
|                                      |                                                           | <b>B6</b>  | 3.57  | 2.78         | 1.81   |
| <b>Tlr2</b>                          | Toll-like receptor 2                                      | <b>SJL</b> | 2.65  | 5.63         | 2.06   |
|                                      |                                                           | <b>B6</b>  | 4.89  | 3.85         | 1.86   |
| <b>Tlr3</b>                          | Toll-like receptor 3                                      | <b>SJL</b> | 2.33  | 3.48         | 1.56   |
|                                      |                                                           | <b>B6</b>  | 2.82  | 2.72         | 1.30   |
| <b>Tlr4</b>                          | Toll-like receptor 4                                      | <b>SJL</b> | 1.44  | 3.52         | 1.15   |
|                                      |                                                           | <b>B6</b>  | 2.75  | 3.09         | 1.84   |
| <b>Tlr5</b>                          | Toll-like receptor 5                                      | <b>SJL</b> | 0.96  | 1.10         | 0.78   |
|                                      |                                                           | <b>B6</b>  | 1.51  | 0.96         | 0.95   |
| <b>Tlr7</b>                          | Toll-like receptor 7                                      | <b>SJL</b> | 2.39  | 3.98         | 1.54   |
|                                      |                                                           | <b>B6</b>  | 3.35  | 2.94         | 1.70   |
| <b>Tlr8</b>                          | Toll-like receptor 8                                      | <b>SJL</b> | 0.93  | 4.30         | 2.17   |
|                                      |                                                           | <b>B6</b>  | 3.63  | 2.43         | 1.34   |
| <b>Tlr9</b>                          | Toll-like receptor 9                                      | <b>SJL</b> | 5.98  | 5.98         | 0.90   |
|                                      |                                                           | <b>B6</b>  | 5.11  | 3.86         | 2.20   |
| <b>Tlr13</b>                         | Toll-like receptor 13                                     | <b>SJL</b> | 1.35  | 4.13         | 1.18   |
|                                      |                                                           | <b>B6</b>  | 3.66  | 2.61         | 1.73   |
| <b>Interferon Regulatory Factors</b> |                                                           |            |       |              |        |
| <b>Irf1</b>                          | Interferon regulatory factor 1                            | <b>SJL</b> | 2.71  | 8.91         | 2.41   |
|                                      |                                                           | <b>B6</b>  | 2.96  | 5.05         | 1.72   |
| <b>Irf2</b>                          | Interferon regulatory factor 2                            | <b>SJL</b> | 1.11  | 1.53         | 1.16   |
|                                      |                                                           | <b>B6</b>  | 1.30  | 1.52         | 1.14   |
| <b>Irf3</b>                          | Interferon regulatory factor 3                            | <b>SJL</b> | 1.11  | 1.00         | 1.21   |
|                                      |                                                           | <b>B6</b>  | 1.13  | 1.08         | 1.12   |
| <b>Irf4</b>                          | Interferon regulatory factor 4                            | <b>SJL</b> | 1.37  | 3.93         | 2.03   |
|                                      |                                                           | <b>B6</b>  | 1.31  | 2.24         | 2.22   |
| <b>Irf5</b>                          | Interferon regulatory factor 5                            | <b>SJL</b> | 2.07  | 3.12         | 1.57   |
|                                      |                                                           | <b>B6</b>  | 2.77  | 2.55         | 1.48   |
| <b>Irf6</b>                          | Interferon regulatory factor 6                            | <b>SJL</b> | 0.80  | 0.88         | 0.85   |
|                                      |                                                           | <b>B6</b>  | 1.07  | 1.28         | 1.13   |
| <b>Irf7</b>                          | Interferon regulatory factor 7                            | <b>SJL</b> | 5.42  | 7.28         | 1.78   |
|                                      |                                                           | <b>B6</b>  | 4.77  | 4.87         | 1.26   |
| <b>Irf8</b>                          | Interferon regulatory factor 8                            | <b>SJL</b> | 2.29  | 5.52         | 2.17   |
|                                      |                                                           | <b>B6</b>  | 3.10  | 3.58         | 1.80   |
| <b>Nfkb1</b><br>(p105)               | Nuclear factor kappa B subunit 1                          | <b>SJL</b> | 1.10  | 1.78         | 0.95   |
|                                      |                                                           | <b>B6</b>  | 1.67  | 1.47         | 1.13   |
| <b>Rela</b><br>(p65)                 | v-rel reticuloendotheliosis viral oncogene homolog A      | <b>SJL</b> | 1.17  | 1.28         | 1.17   |
|                                      |                                                           | <b>B6</b>  | 1.21  | 1.14         | 1.10   |

Table S2 (Continued)

| Gene Symbol                                     | Gene Title                                                    | Strain     | 4 dpi | 7 dpi        | 14 dpi |
|-------------------------------------------------|---------------------------------------------------------------|------------|-------|--------------|--------|
| <b>Type I/II Interferons</b>                    |                                                               |            |       |              |        |
| <b>Ifna4</b>                                    | Interferon alpha 4                                            | <b>SJL</b> | 3.70  | 1.24         | 0.89   |
|                                                 |                                                               | <b>B6</b>  | 1.63  | 1.09         | 0.88   |
| <b>Ifnb1</b>                                    | Interferon beta 1                                             | <b>SJL</b> | 4.23  | 1.47         | 0.85   |
|                                                 |                                                               | <b>B6</b>  | 1.65  | 1.07         | 0.94   |
| <b>Ifng</b>                                     | Interferon gamma                                              | <b>SJL</b> | 1.56  | 5.40         | 1.61   |
|                                                 |                                                               | <b>B6</b>  | 1.53  | 2.71         | 1.51   |
| <b>Type I/II Interferon Receptors</b>           |                                                               |            |       |              |        |
| <b>Ifnar1</b>                                   | interferon alpha/beta receptor 1                              | <b>SJL</b> | 0.93  | 1.21         | 0.99   |
|                                                 |                                                               | <b>B6</b>  | 1.13  | 1.01         | 0.93   |
| <b>Ifnar2</b>                                   | interferon alpha/ beta/omega receptor 2                       | <b>SJL</b> | 1.56  | 1.67         | 1.49   |
|                                                 |                                                               | <b>B6</b>  | 1.54  | 1.43         | 1.09   |
| <b>Ifngr1</b>                                   | Interferon gamma receptor 1                                   | <b>SJL</b> | 1.21  | 1.84         | 1.25   |
|                                                 |                                                               | <b>B6</b>  | 1.58  | 1.49         | 1.27   |
| <b>Ifngr2</b>                                   | Interferon gamma receptor 2                                   | <b>SJL</b> | 1.15  | 1.12         | 1.20   |
|                                                 |                                                               | <b>B6</b>  | 1.00  | 1.13         | 1.00   |
| <b>Signal Transducers</b>                       |                                                               |            |       |              |        |
| <b>Irf9</b>                                     | Interferon regulatory factor 9                                | <b>SJL</b> | 6.06  | 7.33         | 2.75   |
|                                                 |                                                               | <b>B6</b>  | 4.44  | 5.76         | 1.80   |
| <b>Jak1</b>                                     | Janus kinase 1                                                | <b>SJL</b> | 0.72  | 1.22         | 0.81   |
|                                                 |                                                               | <b>B6</b>  | 0.96  | 1.14         | 1.11   |
| <b>Socs1</b>                                    | Suppressor of cytokine signaling 1                            | <b>SJL</b> | 3.67  | 4.84         | 1.62   |
|                                                 |                                                               | <b>B6</b>  | 2.35  | 3.72         | 1.29   |
| <b>Socs2</b>                                    | Suppressor of cytokine signaling 2                            | <b>SJL</b> | 1.15  | 0.99         | 1.08   |
|                                                 |                                                               | <b>B6</b>  | 0.96  | 0.93         | 0.92   |
| <b>Socs3</b>                                    | Suppressor of cytokine signaling 3                            | <b>SJL</b> | 2.75  | 4.15         | 1.59   |
|                                                 |                                                               | <b>B6</b>  | 2.26  | 2.02         | 1.05   |
| <b>Stat1</b>                                    | Signal transducer and activator of transcription 1            | <b>SJL</b> | 8.56  | <b>14.23</b> | 3.90   |
|                                                 |                                                               | <b>B6</b>  | 5.51  | 9.64         | 2.04   |
| <b>Stat2</b>                                    | Signal transducer and activator of transcription 2            | <b>SJL</b> | 2.53  | 4.99         | 1.44   |
|                                                 |                                                               | <b>B6</b>  | 3.63  | 4.48         | 1.25   |
| <b>Stat3</b>                                    | Signal transducer and activator of transcription 3            | <b>SJL</b> | 0.99  | 2.39         | 1.06   |
|                                                 |                                                               | <b>B6</b>  | 1.91  | 2.03         | 1.29   |
| <b>Stat5a</b>                                   | Signal transducer and activator of transcription 5A           | <b>SJL</b> | 1.62  | 2.35         | 1.27   |
|                                                 |                                                               | <b>B6</b>  | 1.82  | 1.62         | 1.61   |
| <b>Stat5b</b>                                   | Signal transducer and activator of transcription 5B           | <b>SJL</b> | 1.00  | 1.08         | 1.01   |
|                                                 |                                                               | <b>B6</b>  | 1.08  | 1.11         | 1.61   |
| <b>Stat6</b>                                    | Signal transducer and activator of transcription 6            | <b>SJL</b> | 1.13  | 2.01         | 1.27   |
|                                                 |                                                               | <b>B6</b>  | 1.75  | 1.59         | 1.34   |
| <b>Tyk2</b>                                     | Tyrosine kinase 2                                             | <b>SJL</b> | 1.15  | 1.24         | 1.19   |
|                                                 |                                                               | <b>B6</b>  | 1.31  | 1.10         | 1.02   |
| <b>Interferon-Dependent Antiviral Effectors</b> |                                                               |            |       |              |        |
| <b>Adar</b>                                     | Adenosine deaminase. RNA-specific                             | <b>SJL</b> | 0.69  | 1.31         | 0.64   |
|                                                 |                                                               | <b>B6</b>  | 1.19  | 1.30         | 1.07   |
| <b>Apobec3</b>                                  | Apolipoprotein B mRNA editing enzyme. catalytic polypeptide 3 | <b>SJL</b> | 2.69  | 3.34         | 1.77   |
|                                                 |                                                               | <b>B6</b>  | 3.72  | 4.57         | 1.47   |
| <b>Apol9a</b>                                   | Apolipoprotein L 9a                                           | <b>SJL</b> | 2.91  | 2.42         | 1.33   |
|                                                 |                                                               | <b>B6</b>  | 2.24  | 2.05         | 1.05   |

Table S2 (Continued)

| Gene Symbol                 | Gene Title                                                  | Strain     | 4 dpi        | 7 dpi        | 14 dpi       |
|-----------------------------|-------------------------------------------------------------|------------|--------------|--------------|--------------|
| <b>Apol9b</b>               | Apolipoprotein L 9b                                         | <b>SJL</b> | 3.54         | 3.93         | 1.75         |
|                             |                                                             | <b>B6</b>  | 3.82         | 3.45         | 1.30         |
| <b>Bst2</b><br>(Tetherin)   | Bone marrow stromal cell antigen 2                          | <b>SJL</b> | 7.30         | 8.86         | 2.76         |
|                             |                                                             | <b>B6</b>  | 4.42         | 5.01         | 1.29         |
| <b>Mb21d1</b><br>(C6orf150) | Mab-21 domain containing 1                                  | <b>SJL</b> | 1.65         | 2.99         | 1.14         |
|                             |                                                             | <b>B6</b>  | 2.01         | 2.21         | 1.25         |
| <b>Cd74</b>                 | CD74 antigen                                                | <b>SJL</b> | 2.08         | <b>15.36</b> | <b>10.65</b> |
|                             |                                                             | <b>B6</b>  | 2.79         | 6.51         | 3.97         |
| <b>Ch25h</b>                | Cholesterol 25-hydroxylase                                  | <b>SJL</b> | 3.64         | 3.71         | 1.44         |
|                             |                                                             | <b>B6</b>  | 3.28         | 2.17         | 1.13         |
| <b>Ddit4</b>                | DNA-damage-inducible transcript 4                           | <b>SJL</b> | 1.08         | 0.78         | 1.06         |
|                             |                                                             | <b>B6</b>  | 0.99         | 0.85         | 0.92         |
| <b>Ddx17</b>                | DEAD (Asp-Glu-Ala-Asp) box polypeptide 17                   | <b>SJL</b> | 0.81         | 0.95         | 0.76         |
|                             |                                                             | <b>B6</b>  | 1.16         | 0.98         | 1.00         |
| <b>Ddx60</b>                | DEAD (Asp-Glu-Ala-Asp) box polypeptide 60                   | <b>SJL</b> | 8.80         | <b>15.53</b> | 2.99         |
|                             |                                                             | <b>B6</b>  | <b>10.64</b> | <b>10.09</b> | 2.51         |
| <b>Gbp2</b>                 | Guanylate binding protein 2                                 | <b>SJL</b> | 3.11         | 8.55         | 2.21         |
|                             |                                                             | <b>B6</b>  | 4.68         | 8.10         | 1.96         |
| <b>Hpse</b>                 | Heparanase                                                  | <b>SJL</b> | 1.52         | 4.69         | 1.46         |
|                             |                                                             | <b>B6</b>  | 1.60         | 2.00         | 1.41         |
| <b>lfi30</b>                | Interferon gamma inducible protein 30                       | <b>SJL</b> | 2.34         | 4.12         | 1.94         |
|                             |                                                             | <b>B6</b>  | 4.04         | 4.23         | 1.69         |
| <b>lfi35</b>                | Interferon-induced protein 35                               | <b>SJL</b> | 4.38         | 5.48         | 2.36         |
|                             |                                                             | <b>B6</b>  | 3.50         | 4.08         | 1.44         |
| <b>lfi44</b>                | Interferon-induced protein 44                               | <b>SJL</b> | 6.91         | <b>10.78</b> | 2.48         |
|                             |                                                             | <b>B6</b>  | 6.00         | 6.79         | 1.34         |
| <b>lfi47</b>                | Interferon gamma inducible protein 47                       | <b>SJL</b> | 2.68         | 6.88         | 1.89         |
|                             |                                                             | <b>B6</b>  | 3.26         | 4.52         | 1.41         |
| <b>lfi202b</b>              | Interferon activated gene 202B                              | <b>SJL</b> | <b>14.75</b> | <b>34.01</b> | 4.76         |
|                             |                                                             | <b>B6</b>  | 0.74         | 0.86         | 0.67         |
| <b>lfi203</b>               | Interferon activated gene 203                               | <b>SJL</b> | 3.21         | 7.43         | 1.98         |
|                             |                                                             | <b>B6</b>  | 6.13         | 5.27         | 2.03         |
| <b>lfit1</b><br>(lsg56)     | Interferon-induced protein with tetratricopeptide repeats 1 | <b>SJL</b> | 9.91         | <b>14.03</b> | 3.05         |
|                             |                                                             | <b>B6</b>  | 7.23         | 9.25         | 1.62         |
| <b>lfit2</b><br>(lsg54)     | Interferon-induced protein with tetratricopeptide repeats 2 | <b>SJL</b> | 3.96         | 8.31         | 1.59         |
|                             |                                                             | <b>B6</b>  | 5.39         | 6.45         | 1.65         |
| <b>lfit3</b><br>(lsg60)     | Interferon-induced protein with tetratricopeptide repeats 3 | <b>SJL</b> | 9.42         | <b>10.02</b> | 2.40         |
|                             |                                                             | <b>B6</b>  | 5.95         | 6.35         | 1.41         |
| <b>lfitm1</b>               | Interferon induced transmembrane protein 1                  | <b>SJL</b> | 1.47         | 3.12         | 1.32         |
|                             |                                                             | <b>B6</b>  | 1.98         | 2.34         | 1.11         |
| <b>lfitm2</b>               | Interferon induced transmembrane protein 2                  | <b>SJL</b> | 1.96         | 2.27         | 1.93         |
|                             |                                                             | <b>B6</b>  | 2.06         | 1.78         | 1.20         |
| <b>lfitm3</b>               | Interferon induced transmembrane protein 3                  | <b>SJL</b> | 5.76         | 7.28         | 2.56         |
|                             |                                                             | <b>B6</b>  | 4.47         | 4.36         | 1.21         |
| <b>lfitm6</b>               | Interferon induced transmembrane protein 6                  | <b>SJL</b> | 1.75         | 2.02         | 1.19         |
|                             |                                                             | <b>B6</b>  | 1.91         | 1.90         | 0.99         |
| <b>lfitm7</b>               | Interferon induced transmembrane protein 7                  | <b>SJL</b> | 1.21         | 1.18         | 0.75         |
|                             |                                                             | <b>B6</b>  | 2.05         | 0.93         | 0.92         |

Table S2 (Continued)

| Gene Symbol               | Gene Title                                                  | Strain     | 4 dpi        | 7 dpi        | 14 dpi |
|---------------------------|-------------------------------------------------------------|------------|--------------|--------------|--------|
| <b>Ifitm10</b>            | Interferon induced transmembrane protein 10                 | <b>SJL</b> | 1.28         | 0.97         | 1.46   |
|                           |                                                             | <b>B6</b>  | 0.78         | 0.80         | 0.88   |
| <b>Isg15</b>              | ISG15 ubiquitin-like modifier                               | <b>SJL</b> | 9.27         | 9.32         | 2.38   |
|                           |                                                             | <b>B6</b>  | 4.59         | 6.28         | 1.06   |
| <b>Isg20</b>              | Interferon-stimulated protein                               | <b>SJL</b> | 3.62         | 4.64         | 1.88   |
|                           |                                                             | <b>B6</b>  | 2.79         | 3.50         | 1.35   |
| <b>Map3k14</b><br>(Nik)   | Mitogen-activated protein kinase kinase kinase 14           | <b>SJL</b> | 1.16         | 1.58         | 1.05   |
|                           |                                                             | <b>B6</b>  | 1.70         | 1.52         | 1.23   |
| <b>Mov10</b>              | Moloney leukemia virus 10                                   | <b>SJL</b> | 1.45         | 1.39         | 0.95   |
|                           |                                                             | <b>B6</b>  | 1.91         | 1.60         | 1.00   |
| <b>Ms4a4a</b>             | Membrane-spanning 4-domains, subfamily A, member 4A         | <b>SJL</b> | 1.23         | 1.74         | 0.80   |
|                           |                                                             | <b>B6</b>  | 2.43         | 1.59         | 1.18   |
| <b>Mx1</b>                | Myxovirus (influenza virus) resistance 1                    | <b>SJL</b> | 3.96         | 5.63         | 1.29   |
|                           |                                                             | <b>B6</b>  | 5.08         | 4.15         | 1.11   |
| <b>Mx2</b>                | Myxovirus (influenza virus) resistance 2                    | <b>SJL</b> | 8.56         | 8.62         | 2.40   |
|                           |                                                             | <b>B6</b>  | 5.75         | 5.18         | 1.25   |
| <b>Nampt</b><br>(Pbef1)   | Nicotinamide phosphoribosyltransferase                      | <b>SJL</b> | 1.21         | 2.03         | 1.07   |
|                           |                                                             | <b>B6</b>  | 1.43         | 1.83         | 1.10   |
| <b>Nt5c3</b>              | 5'-nucleotidase, cytosolic III                              | <b>SJL</b> | 1.36         | 1.15         | 1.40   |
|                           |                                                             | <b>B6</b>  | 0.93         | 1.10         | 0.96   |
| <b>Nt5c3b</b>             | 5'-nucleotidase, cytosolic IIIB                             | <b>SJL</b> | 1.19         | 0.92         | 1.04   |
|                           |                                                             | <b>B6</b>  | 0.99         | 0.88         | 0.96   |
| <b>Oas1a</b>              | 2'-5' oligoadenylate synthetase 1A                          | <b>SJL</b> | 4.43         | 6.08         | 1.92   |
|                           |                                                             | <b>B6</b>  | 4.16         | 4.27         | 1.30   |
| <b>Oas1b</b>              | 2'-5' oligoadenylate synthetase 1B                          | <b>SJL</b> | 8.56         | <b>10.08</b> | 2.82   |
|                           |                                                             | <b>B6</b>  | 5.88         | 5.97         | 1.65   |
| <b>Oas1c</b>              | 2'-5' oligoadenylate synthetase 1C                          | <b>SJL</b> | 2.63         | 2.81         | 2.21   |
|                           |                                                             | <b>B6</b>  | 2.18         | 1.85         | 1.67   |
| <b>Oas1g</b>              | 2'-5' oligoadenylate synthetase 1G                          | <b>SJL</b> | 3.75         | 5.06         | 1.66   |
|                           |                                                             | <b>B6</b>  | 4.72         | 3.85         | 1.33   |
| <b>Oas2</b>               | 2'-5' oligoadenylate synthetase 2                           | <b>SJL</b> | 3.87         | 6.27         | 2.30   |
|                           |                                                             | <b>B6</b>  | 5.81         | 4.79         | 1.67   |
| <b>Oas3</b>               | 2'-5' oligoadenylate synthetase 3                           | <b>SJL</b> | 3.36         | 7.59         | 1.33   |
|                           |                                                             | <b>B6</b>  | 5.39         | 5.49         | 1.25   |
| <b>Oas11</b>              | 2'-5' oligoadenylate synthetase-like 1                      | <b>SJL</b> | 2.81         | 3.81         | 1.03   |
|                           |                                                             | <b>B6</b>  | 3.79         | 3.15         | 1.08   |
| <b>Oas12</b>              | 2'-5' oligoadenylate synthetase-like 2                      | <b>SJL</b> | 7.66         | <b>10.94</b> | 2.64   |
|                           |                                                             | <b>B6</b>  | 6.23         | 8.49         | 1.59   |
| <b>P2ry6</b>              | Pyrimidinergic receptor P2Y, G-protein coupled, 6           | <b>SJL</b> | 1.91         | 2.79         | 1.84   |
|                           |                                                             | <b>B6</b>  | 2.04         | 2.03         | 1.30   |
| <b>Pml</b><br>(Trim19)    | Promyelocytic leukemia                                      | <b>SJL</b> | 1.29         | 2.61         | 0.96   |
|                           |                                                             | <b>B6</b>  | 2.03         | 2.29         | 1.13   |
| <b>Rnasel</b>             | Ribonuclease L (2', 5'-oligoadenylate synthetase-dependent) | <b>SJL</b> | 0.81         | 2.08         | 0.75   |
|                           |                                                             | <b>B6</b>  | 1.29         | 1.37         | 1.14   |
| <b>Rsad2</b><br>(Viperin) | Radical S-adenosyl methionine domain containing 2           | <b>SJL</b> | 3.99         | 6.26         | 1.28   |
|                           |                                                             | <b>B6</b>  | 7.76         | 6.06         | 1.61   |
| <b>Rtp4</b>               | Receptor transporter protein 4                              | <b>SJL</b> | <b>10.01</b> | <b>15.45</b> | 3.66   |
|                           |                                                             | <b>B6</b>  | 7.07         | 8.70         | 1.91   |

Table S2 (Continued)

| Gene Symbol             | Gene Title                                                 | Strain     | 4 dpi | 7 dpi        | 14 dpi |
|-------------------------|------------------------------------------------------------|------------|-------|--------------|--------|
| <b>Samhd1</b>           | SAM domain and HD domain. 1                                | <b>SJL</b> | 1.63  | 3.89         | 1.23   |
|                         |                                                            | <b>B6</b>  | 2.85  | 3.41         | 1.43   |
| <b>Slc15a3</b>          | Solute carrier family 15, member 3                         | <b>SJL</b> | 2.35  | 5.30         | 1.63   |
|                         |                                                            | <b>B6</b>  | 3.17  | 2.71         | 1.32   |
| <b>Slc25a28</b>         | Solute carrier family 25, member 28                        | <b>SJL</b> | 1.22  | 1.00         | 1.20   |
|                         |                                                            | <b>B6</b>  | 0.90  | 0.88         | 0.92   |
| <b>Ssbp3</b>            | Single-stranded DNA binding protein 3                      | <b>SJL</b> | 1.04  | 1.03         | 1.24   |
|                         |                                                            | <b>B6</b>  | 0.87  | 0.89         | 1.00   |
| <b>Trex1</b><br>(Atrip) | Three prime repair exonuclease 1 (ATR interacting protein) | <b>SJL</b> | 1.12  | 0.69         | 0.85   |
|                         |                                                            | <b>B6</b>  | 1.16  | 0.73         | 0.75   |
| <b>Trim12a</b>          | Tripartite motif-containing 12A                            | <b>SJL</b> | 1.05  | 1.03         | 0.77   |
|                         |                                                            | <b>B6</b>  | 4.79  | 5.09         | 2.31   |
| <b>Trim12c</b>          | Tripartite motif-containing 12C                            | <b>SJL</b> | 1.53  | 1.66         | 1.18   |
|                         |                                                            | <b>B6</b>  | 4.61  | 4.68         | 1.96   |
| <b>Trim30a</b>          | Tripartite motif-containing 30A                            | <b>SJL</b> | 4.42  | <b>10.37</b> | 1.92   |
|                         |                                                            | <b>B6</b>  | 7.28  | 7.19         | 2.06   |
| <b>Ifi209</b>           | Interferon activated gene 209                              | <b>SJL</b> | 2.96  | 7.84         | 1.62   |
|                         |                                                            | <b>B6</b>  | 8.10  | 8.71         | 2.29   |
| <b>Ifi213</b>           | Interferon activated gene 213                              | <b>SJL</b> | 1.71  | 2.86         | 0.97   |
|                         |                                                            | <b>B6</b>  | 8.99  | 7.60         | 2.30   |
| <b>Trim5</b>            | Tripartite motif-containing 5                              | <b>SJL</b> | 2.69  | 3.05         | 2.15   |
|                         |                                                            | <b>B6</b>  | 2.55  | 1.90         | 1.30   |
| <b>Trim25</b>           | Tripartite motif-containing 25                             | <b>SJL</b> | 2.59  | 4.69         | 1.50   |
|                         |                                                            | <b>B6</b>  | 4.29  | 3.99         | 1.67   |
| <b>Sun2</b><br>(Unc84b) | Sad1 and UNC84 domain containing 2                         | <b>SJL</b> | 0.83  | 0.97         | 0.82   |
|                         |                                                            | <b>B6</b>  | 0.84  | 1.07         | 0.99   |
| <b>Zbtb16</b><br>(Plzf) | Zinc finger and BTB domain containing 16                   | <b>SJL</b> | 0.52  | 1.11         | 0.67   |
|                         |                                                            | <b>B6</b>  | 1.15  | 1.23         | 1.10   |
| <b>Zc3hav1</b><br>(Zap) | Zinc finger CCCH type, antiviral 1                         | <b>SJL</b> | 4.15  | 6.77         | 3.22   |
|                         |                                                            | <b>B6</b>  | 3.86  | 4.12         | 1.96   |
| <b>Cellular Markers</b> |                                                            |            |       |              |        |
| <b>GFAP</b>             | Glial fibrillary acidic protein                            | <b>SJL</b> | 2.47  | 3.42         | 1.90   |
|                         |                                                            | <b>B6</b>  | 3.88  | 3.55         | 2.03   |
| <b>Sall1</b>            | Sal-like 1                                                 | <b>SJL</b> | 1.29  | 1.39         | 1.37   |
|                         |                                                            | <b>B6</b>  | 1.45  | 1.35         | 1.24   |
| <b>Syp</b>              | Synaptophysin                                              | <b>SJL</b> | 1.01  | 0.92         | 1.15   |
|                         |                                                            | <b>B6</b>  | 0.72  | 0.82         | 0.92   |

Significant fold changes are shown in italic letters (adjusted  $P$  values < 0.05). Bold letters indicate significant fold changes > 10. B6: C57BL/6; dpi: days post infection.

**Fig. S1: RT-qPCR of the cerebrum at 4, 7 and 14 days after TMEV-BeAn infection (dpi).**

*Ifna* mRNA transcripts were downregulated in TMEV- compared to mock-infected SJL and C57BL/6 mice at 14 dpi, whereas no significant impact of TMEV infection on *Ifnb1* mRNA transcripts was found. *Irf7*, *Isg15* and *Eif2ak1* mRNA transcripts were increased in TMEV- compared to mock-infected SJL and C57BL/6 mice at 4, 7 and 14 dpi except for *Isg15* mRNA transcripts in C57BL/6 mice at 14 dpi. Mock-infected SJL: n=5 (4, 7, 14 dpi); TMEV-infected SJL: n=6 (4,7 dpi), n=5 (14 dpi); mock-infected C57BL/6 mice: n=6 (4, 14 dpi), n=5 (7 dpi); TMEV-infected C57BL/6 mice: n=4 (4 dpi), n=3 (7 dpi), n=5 (14 dpi). The mRNA copy numbers were normalized using a normalization factor calculated from three housekeeping genes (*Gapdh*, *Actb*, *Hprt*). Mann Whitney tests: \* p < 0.05; \*\* p < 0.01. Shown are all data points with means. Each data point represents the mRNA copy number of one mouse.

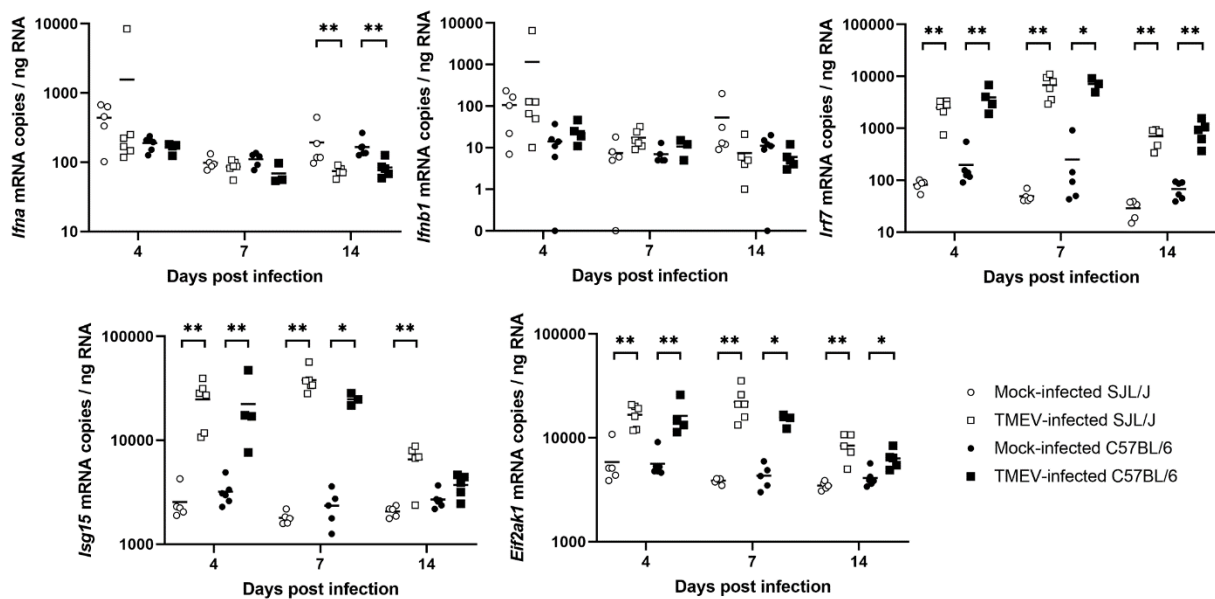



**Fig. S2: ISG15, OAS1 and PKR protein expression in the brain of TMEV-infected C57BL/6 mice.** Shown is the hippocampus of TMEV-infected C57BL/6 mice at 4 (ISG15 and PKR) and 7 (OAS1) days post infection. Immunohistochemistry using the avidin-biotin-peroxidase complex method with the chromogen 3'3-diaminobenzidine and Mayer's hematoxylin counterstaining.

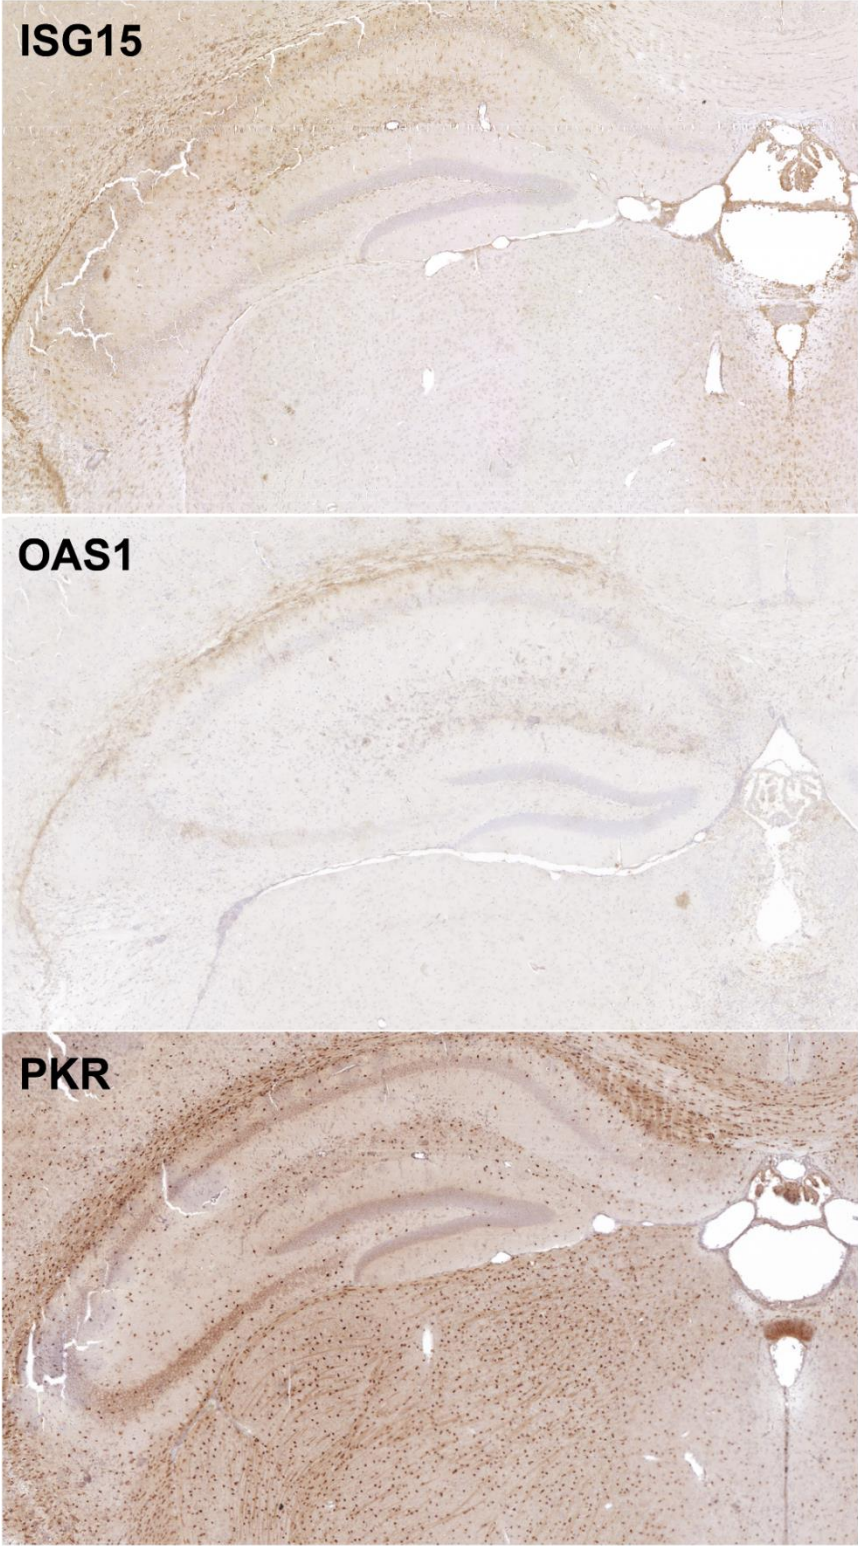

**Fig. S3: Hippocampal cell loss at 4 days after TMEV-BeAn infection.** No significant differences were found between TMEV-infected IFNAR<sup>-/-</sup> (n=6), NesCre<sup>+/-</sup>IFNAR<sup>fl/fl</sup> (n=10), GFAPCre<sup>+/-</sup>IFNAR<sup>fl/fl</sup> (n=9), Syn1Cre<sup>+/-</sup>IFNAR<sup>fl/fl</sup> (n=10) and Cre<sup>-/-</sup>IFNAR<sup>fl/fl</sup> mice (n=7) as well as Tam-treated Sall1CreER<sup>+/-</sup>IFNAR<sup>fl/fl</sup> (n=6) and Sall1CreER<sup>-/-</sup>IFNAR<sup>fl/fl</sup> mice (n=9). Shown are all data points with means. Each data point represents the semiquantitative score of one mouse.

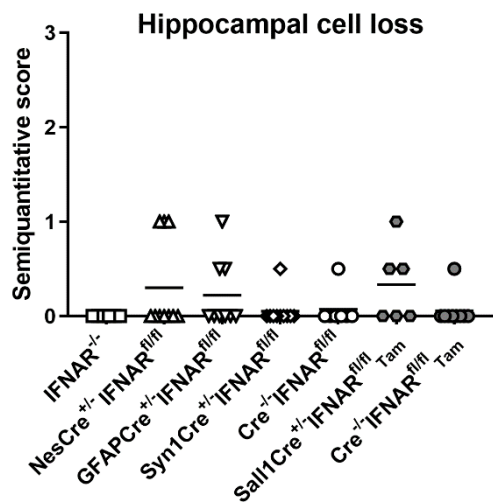

**Fig. S4: Percentages of perivascular CD3<sup>+</sup> T cells, CD45R<sup>+</sup> B cells and Iba-1<sup>+</sup> macrophages in the cerebrum at 4 days after TMEV-BeAn infection.** No significant differences in the percentages of perivascular mononuclear cells were found between TMEV-infected IFNAR<sup>-/-</sup> (n=6), NesCre<sup>+/-</sup>IFNAR<sup>fl/fl</sup> (n=8), GFAPCre<sup>+/-</sup>IFNAR<sup>fl/fl</sup> (n=6), Syn1Cre<sup>+/-</sup>IFNAR<sup>fl/fl</sup> (n=6) and Cre<sup>-/-</sup>IFNAR<sup>fl/fl</sup> mice (n=6) as well as Tam-treated Sall1CreER<sup>+/-</sup>IFNAR<sup>fl/fl</sup> (n=6) and Sall1CreER<sup>-/-</sup>IFNAR<sup>fl/fl</sup> mice (n=9). Shown are all data points with means. Each data point represents the percentage of immunopositive cells of one mouse.

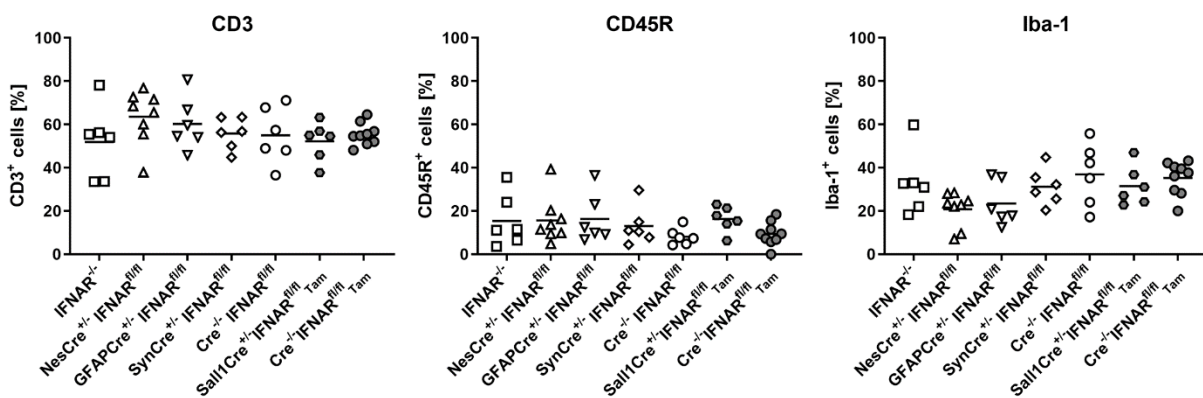

**Fig. S5: GFAP<sup>+</sup>, MAC3<sup>+</sup>, and TMEM119<sup>+</sup> cells in the hippocampus at 4 days after TMEV-BeAn infection.** No significant differences in the semiquantitative analysis of GFAP<sup>+</sup>, MAC3<sup>+</sup> and TMEM119<sup>+</sup> cells were found between TMEV-infected IFNAR<sup>-/-</sup>, NesCre<sup>+/-</sup>IFNAR<sup>fl/fl</sup>, GFAPCre<sup>+/-</sup>IFNAR<sup>fl/fl</sup>, Syn1Cre<sup>+/-</sup>IFNAR<sup>fl/fl</sup> and Cre<sup>-/-</sup>IFNAR<sup>fl/fl</sup> mice (n=5-10). Shown are all data points with means. Each data point represents the semiquantitative score of immunopositive cells of one mouse.

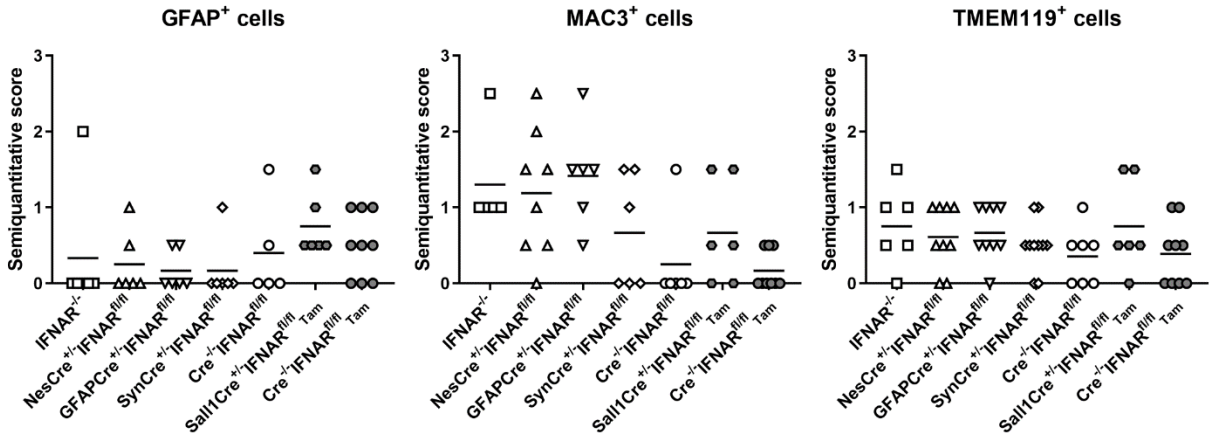

**Fig. S6: A plaque assay confirms the presence of infectious virus in the brain at 4 days after TMEV-BeAn infection.** Infectious virus was found in TMEV-infected IFNAR<sup>-/-</sup>, NesCre<sup>+/-</sup>IFNAR<sup>fl/fl</sup>, GFAPCre<sup>+/-</sup>IFNAR<sup>fl/fl</sup>, Syn1Cre<sup>+/-</sup>IFNAR<sup>fl/fl</sup> and Cre<sup>-/-</sup>IFNAR<sup>fl/fl</sup> mice as well as Tam-treated Sall1CreER<sup>+/-</sup>IFNAR<sup>fl/fl</sup> and Sall1CreER<sup>-/-</sup>IFNAR<sup>fl/fl</sup> mice. Shown are all data points with means. Each data point represents the plaque-forming units/ml of one mouse (n=3).

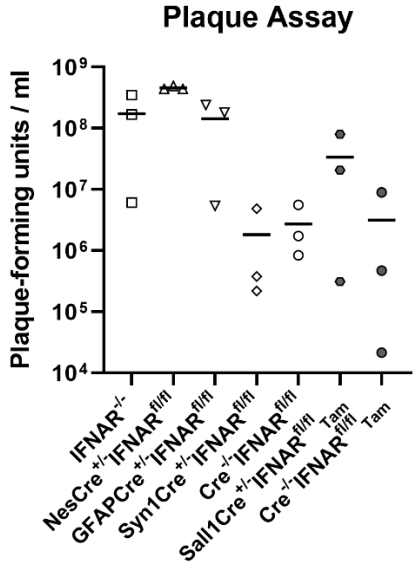

Fig. S7: Nonparametric Spearman correlation coefficients of RT-qPCR data of the cerebrum at 4 days after TMEV-BeAn infection.

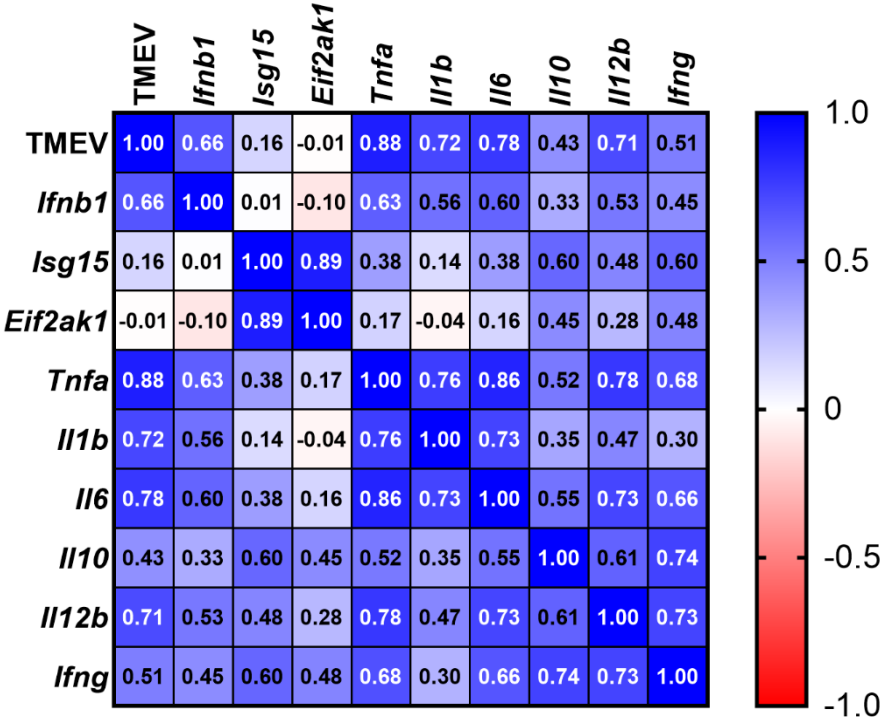

Fig. S8: Nonparametric Spearman correlation coefficients of TMEV RNA and cytokine array data of the cerebrum at 4 days after TMEV-BeAn infection.

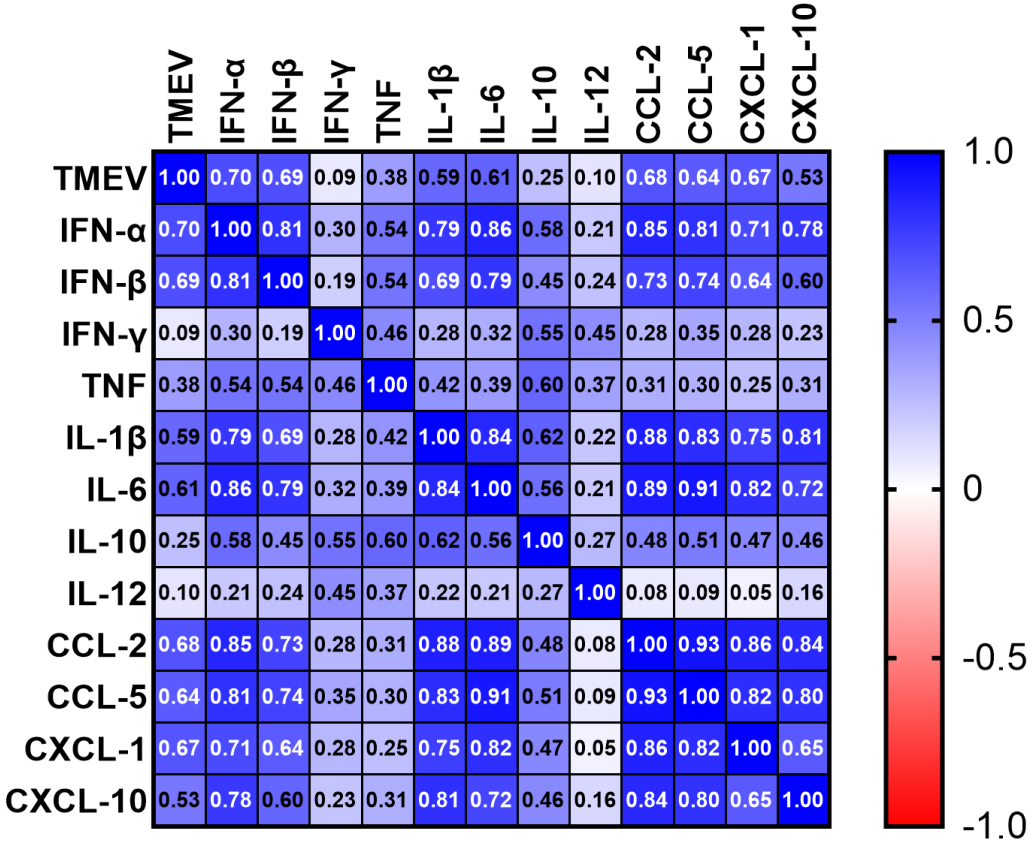

**Fig. S9: TMEV antigen and IL-6 and IL-10 protein expression in the brain of a TMEV-infected NesCre<sup>+/+</sup>IFNAR<sup>fl/fl</sup> mouse.** Shown is the hippocampus of a TMEV-infected NesCre<sup>+/+</sup>IFNAR<sup>fl/fl</sup> mouse at 4 days post infection (serial sections of the animal shown in Fig. 3). TMEV: Note high amount of TMEV antigen in the hippocampus. IL-6: There is a strong IL-6 expression by hippocampal neurons (upper inset), whereas most perivascular mononuclear cells lack an IL-6 immunoreaction (lower inset). IL-10: IL-10 immunoreactivity was only found in few small round and elongated cells (upper inset) as well as medium-sized round cells (arrow; lower inset). Immunohistochemistry using the avidin-biotin-peroxidase complex method with the chromogen 3'3-diaminobenzidine and Mayer's hematoxylin counterstaining (serial sections).

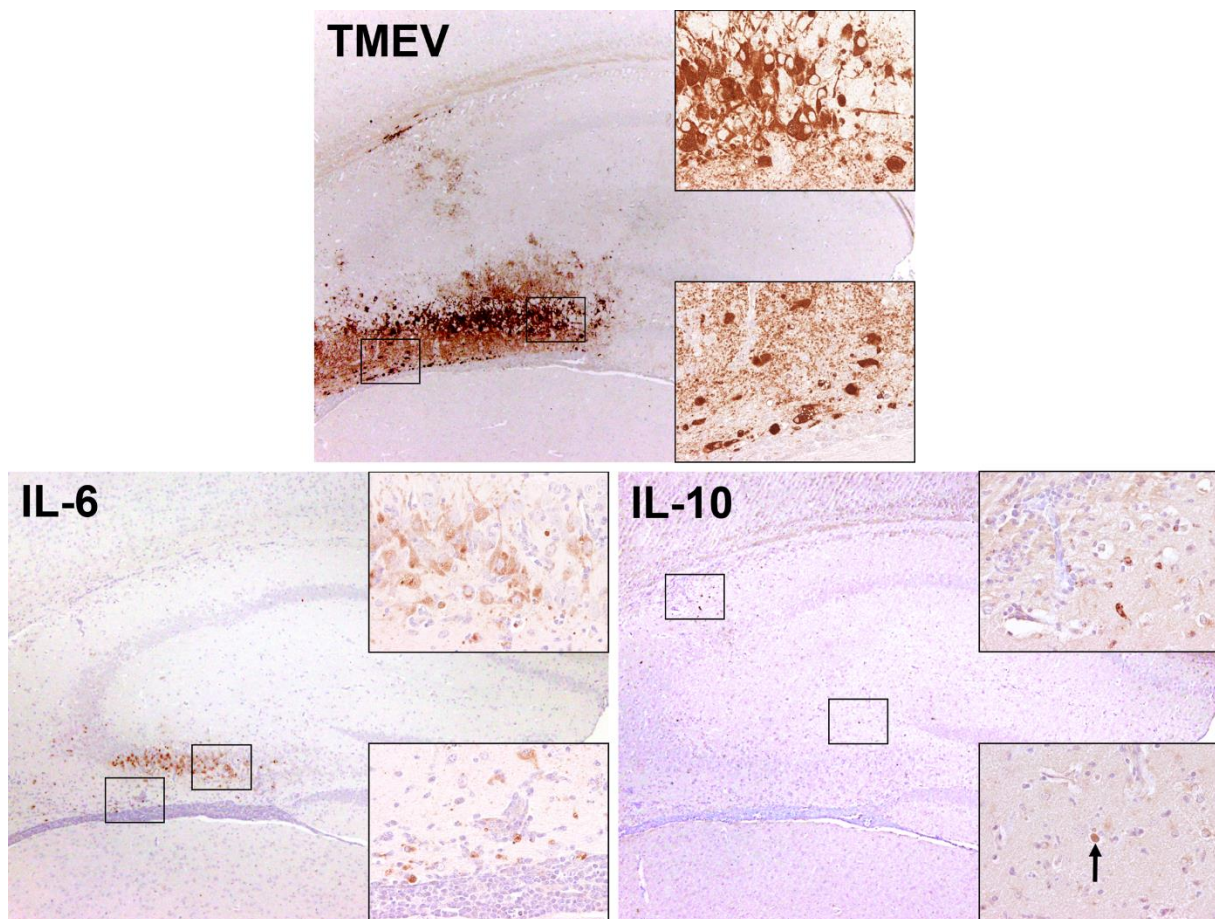

Supplement: 12974_2023_2737_MOESM1_ESM.pdf [file 12974_2023_2737_MOESM1_ESM.pdf]
